# Supplementary material for: Synthesis and thermally induced structural transformation of phthalimide and nitrile-functionalized benzoxazine: toward smart ortho-benzoxazine chemistry for low flammability thermosets
Source: Royal Society of Chemistry journal article supplement (doi:10.1039/c8ra10009h), 2019-01-01
Supplement: c8ra10009h1.pdf [file c8ra10009h1.pdf]

*Supporting Information for*

**Synthesis and thermally induced structural transformation of  
phthalimide and nitrile-functionalized benzoxazine: toward smart  
*ortho*-benzoxazine chemistry for low flammability thermosets**

Kan Zhang,<sup>\*a</sup> Yuqi Liu,<sup>a</sup> Lu Han,<sup>b</sup> Jinyun Wang,<sup>a</sup> and Hatsuo Ishida<sup>\*b</sup>

<sup>a</sup>*School of Materials Science and Engineering, Jiangsu University, Zhenjiang 212013, China.*

*E-mail: zhangkan@ujs.edu.cn*

<sup>b</sup>*Department of Macromolecular Science and Engineering, Case Western Reserve University,  
Cleveland, OH, 44106, USA. E-mail: hxi3@cwru.edu*

### **Synthesis of 2-(2-Hydroxyphenyl)-isoindoline-1,3-dione (*o*-PP)**

Into a 250 mL round flask were placed phthalic anhydride (7.41 g, 0.05 mol), *o*-aminophenol (5.41 g, 0.05 mol), and 60 ml of acetic acid. The mixture was stirred and refluxed for 6 h. After cooling to room temperature, the precipitate was filtered and washed with 200 mL of methanol. Removal of solvent by evaporation afforded an orange crystal (yield ca. 90%). <sup>1</sup>H NMR (DMSO), ppm:  $\delta$  = 6.82-7.93 (8H, Ar), 9.76 (OH). IR spectra (KBr, cm<sup>-1</sup>) = 3383 (O-H stretching), 1787, 1700 (Imide I), 1390 (imide II, C-N stretching), 722 (C=O bending).

### **Synthesis of 2-(3-Phenyl-3,4-dihydro-2*H*-benzo[*e*][1,3]oxazin-8-yl)-isoindoline-1,3-dione (*o*PP-a)**

Into a 100 mL round flask were added 30 mL of xylenes, aniline (1.40 g, 0.15mol), *o*-PP (3.59 g, 0.015mol), and paraformaldehyde (0.91g, 0.03 mol). The mixture was stirred at 120 °C for 6 h. The mixture was cooled to room temperature and precipitated into 100 mL of methanol. Removal of solvent by filtering afforded a yellow powder. (yield ca. 95%, m.p. 209 °C). <sup>1</sup>H NMR (DMSO), ppm:  $\delta$  = 4.72 (s, Ar-CH<sub>2</sub>-N, oxazine), 5.42 (s, O-CH<sub>2</sub>-N, oxazine), 6.85-7.96 (12H, Ar). IR spectra (KBr), cm<sup>-1</sup>: 1774, 1719 (imide I), 1497 (stretching of trisubstituted benzene ring), 1385 (imide II), 1231 (C-O-C asymmetric stretching), 1179 (C-N-C asymmetric stretching), 924 (out-of-plane C-H).

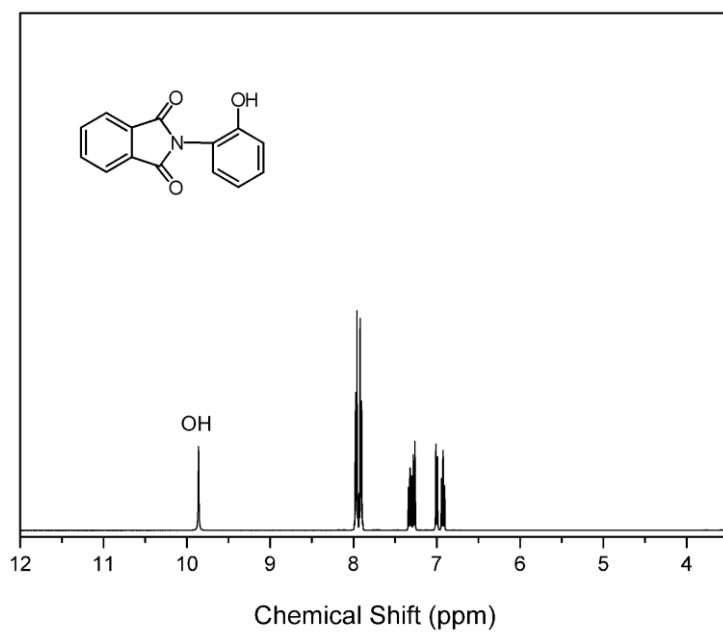

**Figure S1.** <sup>1</sup>H NMR spectrum of *o*PP.

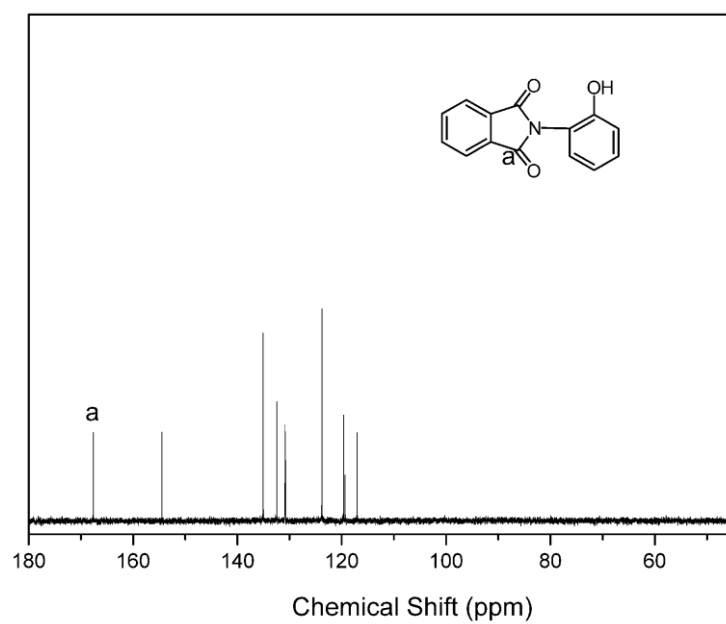

**Figure S2.** <sup>13</sup>C NMR spectrum of *o*PP.

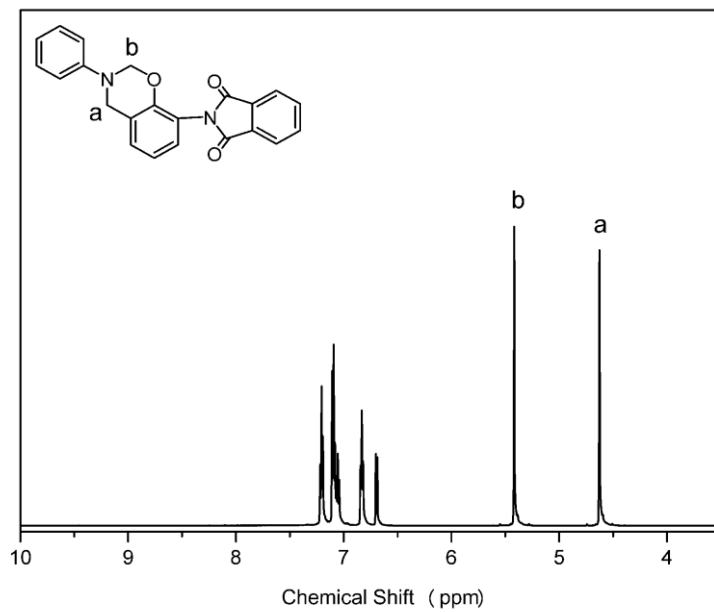

**Figure S3.**  $^1\text{H}$  NMR spectrum of *o*PP-a.

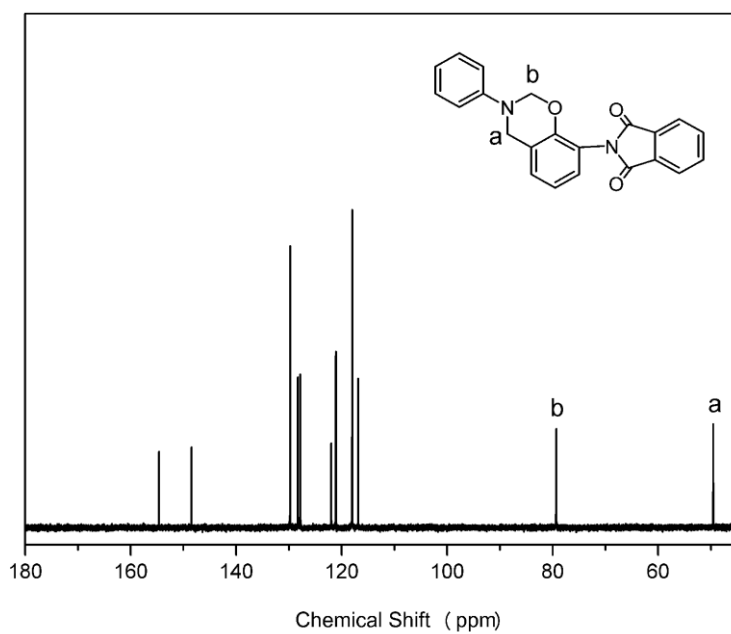

**Figure S4.**  $^{13}\text{C}$  NMR spectrum of *o*PP-a.

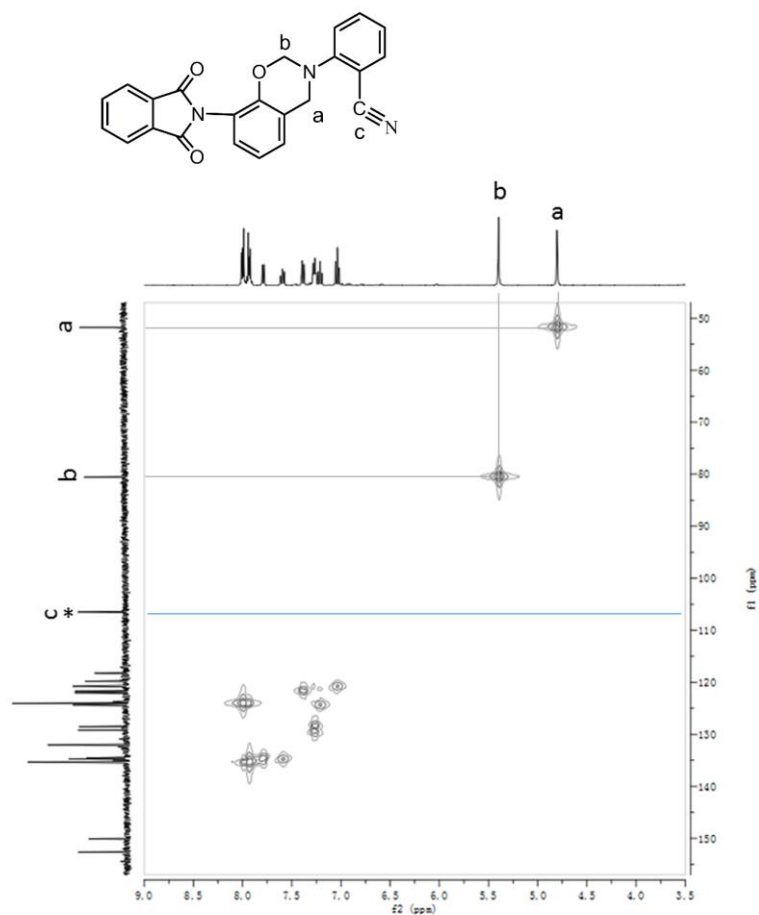

**Figure S5.** <sup>1</sup>H-<sup>13</sup>C HMQC spectrum of *o*PP-an.

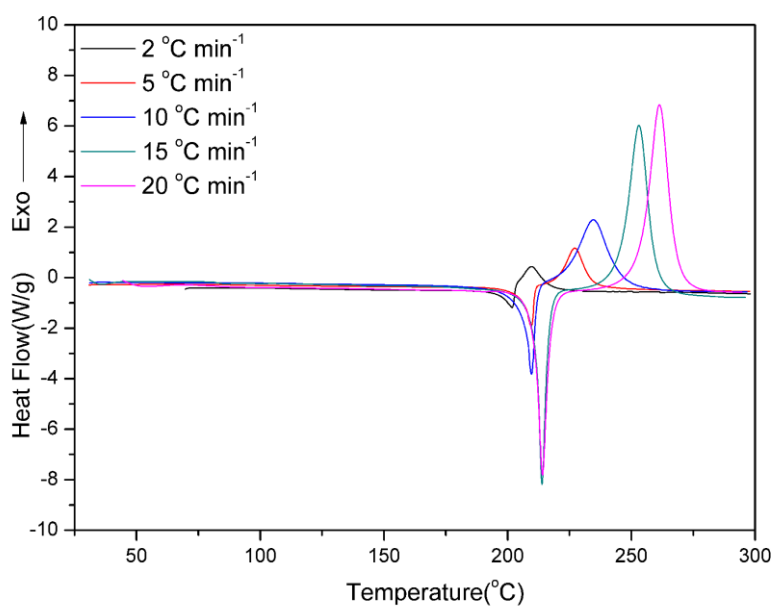

**Figure S6.** DSC curves of *o*PP-a at different heating rates.

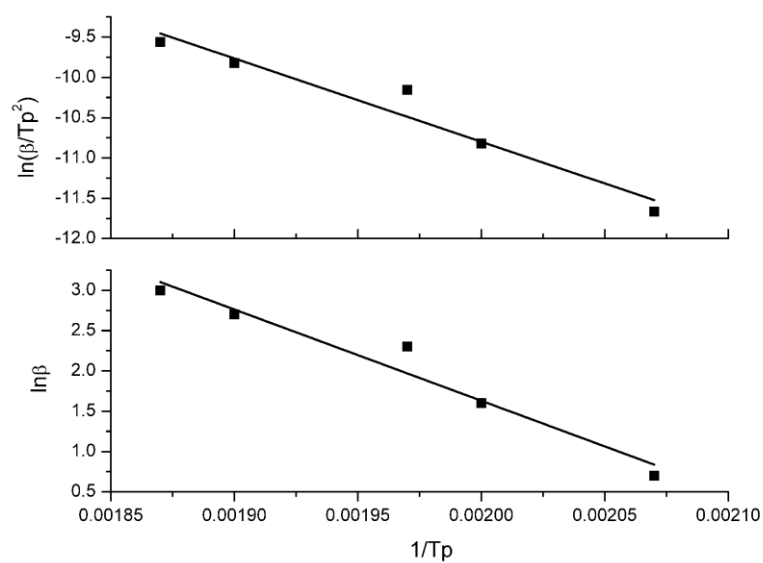

**Figure S7.** Representations of Kissinger and Ozawa methods for the calculation of activation energy for *o*PP-a.

**Table S1.** The Activation Energy of *o*PP-a obtained by Kissinger and Ozawa

| Sample        | Methods.       |                |
|---------------|----------------|----------------|
|               | Kissinger      | Ozawa          |
|               | $E_a$ (kJ/mol) | $E_a$ (kJ/mol) |
| <i>o</i> PP-a | 86.0           | 89.5           |
